# Supplementary material
Source: Springer Nature journal article supplement (https://www.springermedizin.de/resource/supplementary/13024_2014_532_MOESM1_ESM.pdf/9644330)

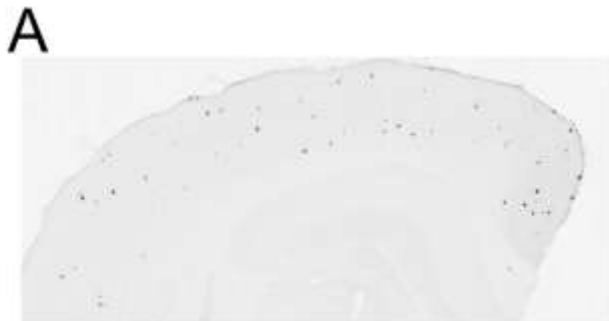

TREM2 WT male

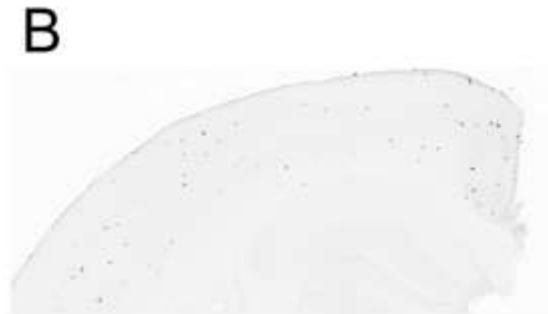

TREM2 Het male

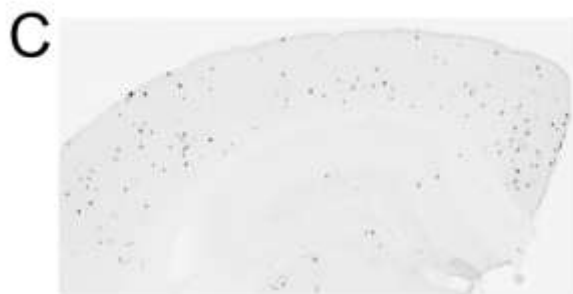

TREM2 WT female

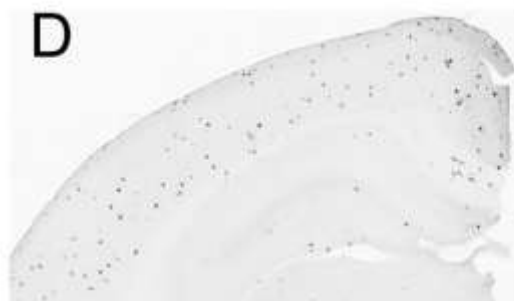

TREM2 Het female

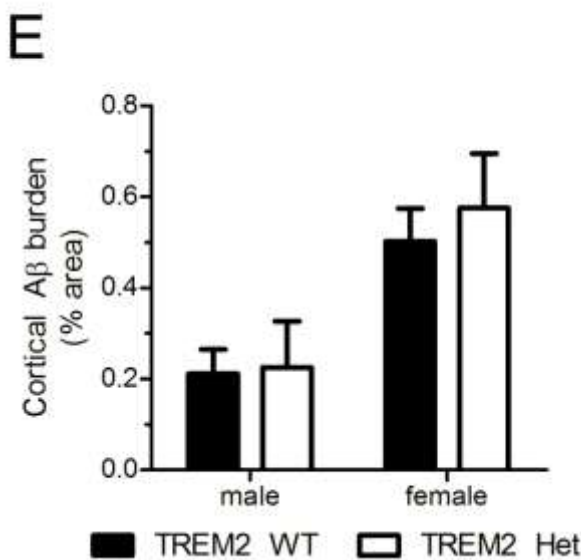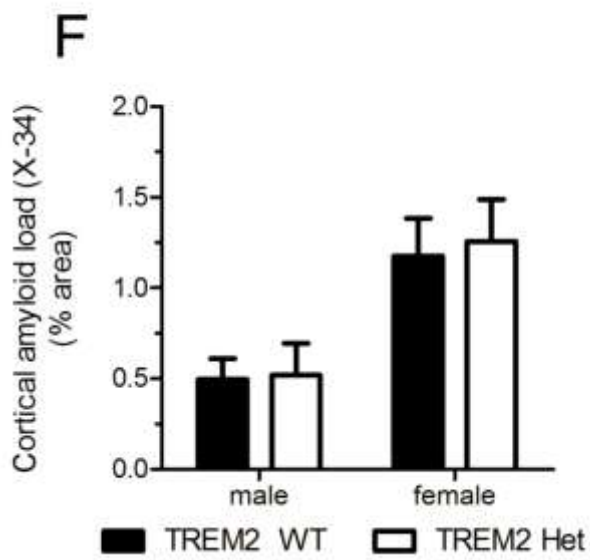

Supplement: MOESM1 [file 9644330]
